# Supplementary material for: The complete mitogenome of Orcula dolium (Draparnaud, 1801); ultra-deep sequencing from a single long-range PCR using the Ion-Torrent PGM
Source: PubMed Central journal article supplement (PMC5379511; doi:10.1186/s41065-017-0028-2), 2017-04-04
Supplement: 41065_2017_28_MOESM1_ESM.pdf [file 41065_2017_28_MOESM1_ESM.pdf]

Merged assembly

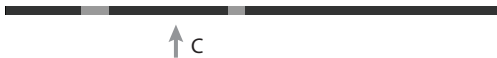

SPades de novo

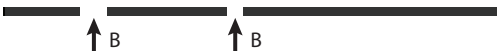

Reads to Gastrocopta contig

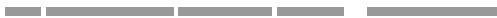

Reads to Vertigo contig

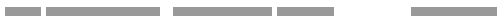

Reads to Pupilla contig

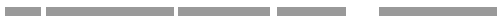

↑ A

↑ A

↑ A

↑ A
