# Supplementary material for: The complete mitogenome of Orcula dolium (Draparnaud, 1801); ultra-deep sequencing from a single long-range PCR using the Ion-Torrent PGM
Source: Hereditas. 2017 Apr 4;154:7. doi: 10.1186/s41065-017-0028-2 (PMC5379511; doi:10.1186/s41065-017-0028-2)
Supplement: Supplementary file 2 — Secondary structures of the inferred tRNAs of Orcula dolium. (PDF 107 kb) [file 41065_2017_28_MOESM2_ESM.pdf]

|                                                                                                                                                                                                                                                                                                                                                                                                                                                                                                            |                                                                                                                                                                                                                                                                                                                                                                                                                                                                                                                      |                                                                                                                                                                                                                                                                                                                                                                                                                                                                                                                                          |                                                                                                                                                                                                                                                                                                                                                                                                                                                                                                                     |                                                                                                                                                                                                                                                                                                                                                                                                                                                                                                  |
|------------------------------------------------------------------------------------------------------------------------------------------------------------------------------------------------------------------------------------------------------------------------------------------------------------------------------------------------------------------------------------------------------------------------------------------------------------------------------------------------------------|----------------------------------------------------------------------------------------------------------------------------------------------------------------------------------------------------------------------------------------------------------------------------------------------------------------------------------------------------------------------------------------------------------------------------------------------------------------------------------------------------------------------|------------------------------------------------------------------------------------------------------------------------------------------------------------------------------------------------------------------------------------------------------------------------------------------------------------------------------------------------------------------------------------------------------------------------------------------------------------------------------------------------------------------------------------------|---------------------------------------------------------------------------------------------------------------------------------------------------------------------------------------------------------------------------------------------------------------------------------------------------------------------------------------------------------------------------------------------------------------------------------------------------------------------------------------------------------------------|--------------------------------------------------------------------------------------------------------------------------------------------------------------------------------------------------------------------------------------------------------------------------------------------------------------------------------------------------------------------------------------------------------------------------------------------------------------------------------------------------|
| <div>Alanine<br/>(A)</div> <div><div><div>c</div><div>a</div><div>g-c</div><div>g-c</div><div>t c</div><div>a-t</div><div>g-c</div><div>t+g</div><div>a-t</div><div>a</div><div>t</div><div>tttg</div><div>a</div><div>lll+ g</div><div>t tttc</div><div>aaat t</div><div>a +lll</div><div>a t</div><div>t gaag</div><div>g</div><div>a</div><div>a</div><div>a</div><div>t-aa</div><div>t-a</div><div>t-a</div><div>a-t</div><div>t-a</div><div>t c</div><div>t a</div><div>tgc</div></div></div>         | <div>Arginine<br/>(R)</div> <div><div><div>t</div><div>t-a</div><div>a-t</div><div>a-t</div><div>a-t</div><div>a-t</div><div>a-t</div><div>t-a</div><div>g-c</div><div>t</div><div>g</div><div>actot</div><div>g g</div><div>lllll a</div><div>gatg</div><div>tgaga t</div><div>c llll</div><div>c t</div><div>ctac</div><div>a</div><div>t</div><div>a</div><div>a</div><div>a</div><div>at-agt</div><div>t-a</div><div>a-t</div><div>a-t</div><div>g-c</div><div>t c</div><div>t g</div><div>tcg</div></div></div> | <div>Asparagine<br/>(N)</div> <div><div><div>t</div><div>t-a</div><div>a-t</div><div>t-a</div><div>g+t</div><div>g-c</div><div>a-t</div><div>t-a</div><div>g-c</div><div>t</div><div>g</div><div>aga</div><div>a</div><div>lll c</div><div>t ttcg</div><div>tct c</div><div>t llll</div><div>a a</div><div>a aagc</div><div>a</div><div>g</div><div>a</div><div>a</div><div>c</div><div>a</div><div>ca</div><div>t-a</div><div>t-a</div><div>a-t</div><div>a-t</div><div>a-t</div><div>a a</div><div>t a</div><div>gtt</div></div></div> | <div>Aspartate<br/>(D)</div> <div><div><div>a</div><div>t-a</div><div>t-a</div><div>t-t</div><div>t+g</div><div>a-t</div><div>t-a</div><div>c-g</div><div>g</div><div>t</div><div>gttg t</div><div>lll+ c</div><div>atagc t</div><div>aa</div><div>tttg</div><div>a lll+</div><div>a aat</div><div>t</div><div>t</div><div>a</div><div>g</div><div>a</div><div>ta</div><div>c-g</div><div>t-a</div><div>c-g</div><div>c-g</div><div>c-g</div><div>t a</div><div>t a</div><div>t a</div><div>gtc</div></div></div>   | <div>Cysteine<br/>(C)</div> <div><div><div>t</div><div>g+t</div><div>t-a</div><div>a-t</div><div>a-t</div><div>g-c</div><div>g+t</div><div>t</div><div>cc</div><div>a</div><div>lll t</div><div>gg t</div><div>a llll</div><div>t a</div><div>t aaac</div><div>a</div><div>a</div><div>t</div><div>a-t</div><div>a-t</div><div>t-a</div><div>g+t</div><div>a-t</div><div>t-a</div><div>t a</div><div>t a</div><div>gca</div></div></div>                                                         |
| <div>Glutamate<br/>(E)</div> <div><div><div>a</div><div>t-a</div><div>g+t</div><div>t-a</div><div>t-a</div><div>g+t</div><div>g-c</div><div>g+t</div><div>t-a</div><div>at</div><div>t</div><div>tttta a</div><div>a</div><div>lllll a</div><div>t tatg</div><div>aaaat t</div><div>a llll</div><div>g aa</div><div>atac</div><div>a</div><div>a</div><div>a</div><div>a-ta</div><div>t-a</div><div>a-t</div><div>t-a</div><div>c-g</div><div>t t</div><div>t a</div><div>ttc</div></div></div>            | <div>Glutamine<br/>(Q)</div> <div><div><div>t</div><div>t-a</div><div>t-a</div><div>t-a</div><div>t-a</div><div>g+t</div><div>c-g</div><div>a-t</div><div>t+g</div><div>c</div><div>t</div><div>tttc a</div><div>a</div><div>llll a</div><div>aaag a</div><div>c tgtg</div><div>a +lll</div><div>a a</div><div>c gcac</div><div>g</div><div>a</div><div>g</div><div>a</div><div>g-ca</div><div>a-t</div><div>a-t</div><div>a-t</div><div>c t</div><div>a a</div><div>t a</div><div>ttg</div></div></div>             | <div>Glycine<br/>(G)</div> <div><div><div>t</div><div>t-a</div><div>t+g</div><div>a-t</div><div>c-g</div><div>t-a</div><div>t-a</div><div>a-t</div><div>a-t</div><div>a-t</div><div>at</div><div>a</div><div>gagg a</div><div>llll t</div><div>t tatg</div><div>ctcc c</div><div>t +lll</div><div>a ac</div><div>gtac</div><div>g</div><div>t</div><div>a</div><div>t-ag</div><div>c-g</div><div>c-g</div><div>a c</div><div>c-g</div><div>c a</div><div>t a</div><div>tcc</div></div></div>                                             | <div>Histidine<br/>(H)</div> <div><div><div>c</div><div>a-t</div><div>a-t</div><div>g-c</div><div>c-g</div><div>t-a</div><div>a-t</div><div>a-t</div><div>t-a</div><div>t</div><div>g</div><div>gagat t</div><div>lll l t</div><div>t tgg</div><div>ctcaa a</div><div>a lll+</div><div>t c</div><div>a act</div><div>a</div><div>t</div><div>g</div><div>g</div><div>t-aa</div><div>t-a</div><div>t-a</div><div>a-t</div><div>t-a</div><div>t a</div><div>t g</div><div>gtg</div></div></div>                       | <div>Isoleucine<br/>(I)</div> <div><div><div>t</div><div>g-c</div><div>a-t</div><div>g-c</div><div>g-c</div><div>c-g</div><div>a-t</div><div>a-t</div><div>c-g</div><div>a</div><div>cttaa a</div><div>lllll t</div><div>ggaatt a</div><div>g llll</div><div>aa</div><div>acgg</div><div>t</div><div>a</div><div>a</div><div>t</div><div>c-ga</div><div>a</div><div>a-t</div><div>t-a</div><div>c-g</div><div>a-t</div><div>t t</div><div>t g</div><div>gat</div></div></div>                    |
| <div>Leucine<br/>(L<sup>1</sup>)</div> <div><div><div>a</div><div>t-a</div><div>a-t</div><div>t-a</div><div>t-a</div><div>a-t</div><div>a-t</div><div>t+g</div><div>g</div><div>t+g</div><div>g</div><div>tgga</div><div>ag g</div><div>llll t</div><div>t acg</div><div>acct t</div><div>t lll</div><div>t t</div><div>t tgc</div><div>a</div><div>g</div><div>t</div><div>a</div><div>ag</div><div>a-t</div><div>t-a</div><div>g-c</div><div>a-t</div><div>c a</div><div>tag</div></div></div>           | <div>Leucine<br/>(L<sup>2</sup>)</div> <div><div><div>t</div><div>a-t</div><div>a-t</div><div>a-t</div><div>t-a</div><div>a-t</div><div>a-t</div><div>g-c</div><div>t</div><div>cttt t</div><div>ag g</div><div>llll c</div><div>a acg</div><div>gaaa t</div><div>a lll</div><div>t ta</div><div>a tgc</div><div>a</div><div>a</div><div>a</div><div>c ca</div><div>a-t</div><div>g-c</div><div>g-c</div><div>t+g</div><div>t c</div><div>t g</div><div>taa</div></div></div>                                        | <div>Lysine<br/>(K)</div> <div><div><div>a</div><div>a-t</div><div>g-c</div><div>t-t</div><div>t-a</div><div>c-g</div><div>t-a</div><div>a att</div><div>t</div><div>a</div><div>ga g</div><div>a</div><div>gccg</div><div>a</div><div>g</div><div>a aggc</div><div>c</div><div>a</div><div>a</div><div>t-aat</div><div>t-a</div><div>a-t</div><div>g-c</div><div>a-t</div><div>t a</div><div>t a</div><div>ttt</div></div></div>                                                                                                        | <div>Methionine<br/>(M)</div> <div><div><div>a</div><div>c-g</div><div>t-a</div><div>a-t</div><div>a-t</div><div>a-t</div><div>a-t</div><div>a-t</div><div>a-t</div><div>c</div><div>cct c</div><div>lll t</div><div>a a</div><div>lll t</div><div>c tcga</div><div>gga a</div><div>t llll</div><div>c cc</div><div>t agct</div><div>a</div><div>a</div><div>g</div><div>a</div><div>t-aa</div><div>t-a</div><div>g-c</div><div>g-c</div><div>g-c</div><div>c a</div><div>c a</div><div>cat</div></div></div>       | <div>Phenylalanine<br/>(F)</div> <div><div><div>g</div><div>t-a</div><div>a-t</div><div>g-c</div><div>g-c</div><div>t-a</div><div>g+t</div><div>g-c</div><div>a-t</div><div>t</div><div>ctt</div><div>a</div><div>lll a</div><div>aa</div><div>lll a</div><div>c ttca</div><div>gaa t</div><div>a llll</div><div>t a</div><div>t aagt</div><div>a</div><div>a</div><div>a-ta</div><div>a-t</div><div>g-c</div><div>c-g</div><div>t+g</div><div>t g</div><div>t g</div><div>gaa</div></div></div> |
| <div>Proline<br/>(P)</div> <div><div><div>a</div><div>t-a</div><div>t-a</div><div>a-t</div><div>a-t</div><div>a-t</div><div>a-t</div><div>a-t</div><div>aa</div><div>g-c</div><div>a</div><div>a</div><div>actttt g</div><div>t a</div><div>lllll g</div><div>tttg</div><div>tgaaa t</div><div>a llll</div><div>a tc</div><div>aaac</div><div>a</div><div>a</div><div>a</div><div>t-aa</div><div>t-a</div><div>a-t</div><div>a-t</div><div>c-g</div><div>t a</div><div>t g</div><div>tgg</div></div></div> | <div>Serine<br/>(S<sup>1</sup>)</div> <div><div><div>t</div><div>t-a</div><div>a-t</div><div>a-t</div><div>a-t</div><div>c-g</div><div>a-t</div><div>t-t</div><div>tat</div><div>c</div><div>ccctt</div><div>t</div><div>lll+ t</div><div>gggag</div><div>t</div><div>t</div><div>att</div><div>a t</div><div>a</div><div>t</div><div>t-a</div><div>t+g</div><div>a-t</div><div>a-t</div><div>g+t</div><div>g-c</div><div>c a</div><div>t a</div><div>gct</div></div></div>                                          | <div>Serine<br/>(S<sup>2</sup>)</div> <div><div><div>t</div><div>a-t</div><div>g+t</div><div>t-a</div><div>g-c</div><div>g-c</div><div>a-t</div><div>t-t</div><div>a</div><div>t</div><div>tttt</div><div>tt a</div><div>lll+ g</div><div>t ttg</div><div>taag a</div><div>t :l+</div><div>g t</div><div>a tat</div><div>g</div><div>tat</div><div>g</div><div>c</div><div>a-ttc</div><div>a-t</div><div>g+t</div><div>g-c</div><div>a-t</div><div>t-a</div><div>t a</div><div>t a</div><div>tga</div></div></div>                       | <div>Threonine<br/>(T)</div> <div><div><div>c</div><div>g-c</div><div>c-g</div><div>t-a</div><div>g-c</div><div>c a</div><div>t-a</div><div>a-t</div><div>t</div><div>ctt t</div><div>t</div><div>ctt t</div><div>lll a</div><div>aa</div><div>a</div><div>ttta</div><div>gaa a</div><div>c llll</div><div>c t</div><div>a aaat</div><div>a</div><div>ta</div><div>a</div><div>t</div><div>t-aa</div><div>t-a</div><div>g-c</div><div>a-t</div><div>t-a</div><div>t a</div><div>t a</div><div>tgt</div></div></div> | <div>Tryptophan<br/>(W)</div> <div><div><div>g</div><div>a-t</div><div>t-a</div><div>a-t</div><div>t-a</div><div>a-t</div><div>a-ttgaata</div><div>t</div><div>a</div><div>a</div><div>a</div><div>ttga</div><div>c</div><div>a llll</div><div>a aact</div><div>g</div><div>a</div><div>a</div><div>t</div><div>c-gaaata</div><div>t-a</div><div>g-c</div><div>a-t</div><div>t-a</div><div>c a</div><div>t a</div><div>tca</div></div></div>                                                     |
| <div>Tyrosine<br/>(Y)</div> <div><div><div>t</div><div>t-a</div><div>t-a</div><div>t-t</div><div>t-a</div><div>t-a</div><div>g-g</div><div>c</div><div>coct</div><div>a</div><div>lllll c</div><div>ca</div><div>t</div><div>atct</div><div>ggga a</div><div>a llll</div><div>a g</div><div>a taga</div><div>t</div><div>c</div><div>g</div><div>t</div><div>g-c</div><div>t-a</div><div>a-t</div><div>g-c</div><div>t+g</div><div>t a</div><div>t a</div><div>gta</div></div></div>                       | <div>Valine<br/>(V)</div> <div><div><div>a</div><div>c-g</div><div>t-a</div><div>a-t</div><div>a-t</div><div>t+g</div><div>a-t</div><div>t</div><div>cagt</div><div>a</div><div>lllll t</div><div>c tatg</div><div>gtca c</div><div>t +lll</div><div>a g</div><div>a gtac</div><div>g</div><div>a</div><div>t</div><div>a</div><div>t-aa</div><div>a-t</div><div>t-a</div><div>c-g</div><div>t-a</div><div>c t</div><div>t a</div><div>tac</div></div></div>                                                         |                                                                                                                                                                                                                                                                                                                                                                                                                                                                                                                                          |                                                                                                                                                                                                                                                                                                                                                                                                                                                                                                                     |                                                                                                                                                                                                                                                                                                                                                                                                                                                                                                  |
